# Supplementary material for: Gestational dexamethasone exposure impacts hippocampal excitatory synaptic transmission and learning and memory function with transgenerational effects
Source: PubMed Central journal article supplement — Acta Pharm Sin B. 2023 May 15;13(9):3708–27. doi: 10.1016/j.apsb.2023.05.013 (PMC10501875; doi:10.1016/j.apsb.2023.05.013), 2023-05-15
Supplement: mmc1.pdf [file mmc1.pdf]

**Supporting Information for  
Original article**

**Gestational dexamethasone exposure impacts hippocampal  
excitatory synaptic transmission and learning and memory function  
with transgenerational effects**

**Mingcui Luo<sup>a,c,†</sup>, Yiwen Yi<sup>b,c,†</sup>, Songqiang Huang<sup>b,c</sup>, Shiyun Dai<sup>b,c</sup>, Lulu Xie<sup>c,d</sup>,  
Kexin Liu<sup>c,e</sup>, Shuai Zhang<sup>a,c</sup>, Tao Jiang<sup>b,c</sup>, Tingting Wang<sup>a,c</sup>, Baozhen Yao<sup>c,d</sup>, Hui  
Wang<sup>b,c</sup>, Dan Xu<sup>a,c,\*</sup>**

*<sup>a</sup>Department of Obstetrics, Zhongnan Hospital of Wuhan University, School of  
Pharmaceutical Sciences, Wuhan University, Wuhan 430071, China*

*<sup>b</sup>Department of Pharmacology, Taikang Medical School (School of Basic Medical  
Sciences), Wuhan University, Wuhan 430071, China*

*<sup>c</sup>Hubei Provincial Key Laboratory of Developmentally Originated Disease, Wuhan  
430071, China*

*<sup>d</sup>Department of Pediatrics, Renmin Hospital of Wuhan University, Wuhan 430071,  
China*

*<sup>e</sup>Department of Pharmacy, Zhongnan Hospital of Wuhan University, Wuhan 430071,  
China*

Received 10 February 2023; received in revised form 20 April 2023; accepted 6 May  
2023

\*Corresponding author.

E-mail address: [xuyidan70188@whu.edu.cn](mailto:xuyidan70188@whu.edu.cn) (Dan Xu).

†These authors made equal contributions to this work.

## 1. Supporting tables

**Table S1** Oligonucleotide primers used in quantitative real-time PCR.

| Genes          | Forward primers         | Reverse primers         | Species     |
|----------------|-------------------------|-------------------------|-------------|
| <i>Sirt1</i>   | AGGGAACCTCTGCCTCATCTAC  | TTGGCATACTCGCCACCTAAC   | Rat         |
| <i>Cdk5</i>    | AAGGCACCTACGGAAGTGTG    | CCCTCATCGTCATCGTCCAG    | Rat         |
| <i>Syn1</i>    | CTACATCCCACCTTCTCATTCC  | GGGAGGAAATCACCCCTTTAG   | Rat         |
| <i>Snap25</i>  | GGGCAATAATCAGGATGGAGTAG | TTGTTACCCTGCGGATGAAG    | Rat         |
| <i>P35</i>     | ACCGTTGCCTCTCAGTTATC    | CTCCTGACCACTCTCATTCTTC  | Rat         |
| <i>Dapk1</i>   | GCCTATGCCTCAAGCTGTAA    | GTCCATAAAGACCCTACCCAAG  | Rat         |
| <i>Pkc</i>     | TATGCCTTCTCTCTCCCTAGAC  | CCAGCCTCCCCTTAATTCTAC   | Rat         |
| <i>Camk2a</i>  | CAGGAGTATGCTGCCAAGATTA  | CCAGTGACCAGATCGAAGATAAG | Rat         |
| <i>Pka</i>     | CAAGTGGTTTGCCACAACCTG   | CGGATCTCTTCCTCCTCATAGT  | Rat         |
| <i>Rsk</i>     | CTTCGTCCTGTACACCATCAG   | GTTCCCAGACTCATCCACATAC  | Rat         |
| <i>Gapdh</i>   | CAGCAAGGATACTGAGAGCAAG  | GGATGGAATTGTGAGGGAGATG  | Rat         |
| <i>sirt1</i>   | CAAGCACCGAACCCTTAT      | CTGTGTCCGTTTCCTTATCC    | Danio rerio |
| <i>cdk5</i>    | CTCTACAGCACCCCTTACTTTG  | GTCCCTCTATCCTATGGTGAA   | Danio rerio |
| <i>syn1</i>    | CGTCCCTCTTCCTGACTAA     | CCTGATCAATGACGCCTAAA    | Danio rerio |
| <i>snap25</i>  | CCACATGGCCCTTGATATG     | AGGCAGAGCAGAGGTTTA      | Danio rerio |
| <i>bdnf</i>    | GAAGGACGTTGACCTGTATG    | TCACCCACTGGCTAATACT     | Danio rerio |
| $\beta$ -Actin | CAGAACTGTTGCCACCTTA     | GTTAGACAACCTCCCTTTC     | Danio rerio |
| <i>CDK5</i>    | GATGTCGATGACCAGTTGAAGA  | TCGGATAGGGCTTATAGTCTGG  | Human       |
| <i>GAPDH</i>   | GTCTCCTCTGACTTCAACAGCG  | ACCACCCTGTTGCTGTAGCCAA  | Human       |

*Sirt1*, Sirtuin 1; *Cdk5*, cyclin-dependent kinase 5, *Syn1*: synapsin I; *Snap25*, synaptosome-associated protein 25; *Dapk1*, death associated protein kinase 1; *Pkc*, protein kinase C; *Camk2a*, calcium/calmodulin dependent protein kinase II alpha; *Pka*, protein kinase A; *Rsk*, ribosomal protein S6 kinase; *Bdnf*, brain-derived neurotrophic factor; *Gapdh*, glyceraldehyde-3-phosphate dehydrogenase;  $\beta$ -actin, beta-actin.

**Table S2** Statistics and analysis of clinical sample information.

| Visit No. | Group   | Sex  | Maternal age (year) | GA at birth (week) | Age at CDK5 test (day) | Age at CDK5 test (week) | Corrected age (week) | Body weight (kg) | Pregnancy mode  |
|-----------|---------|------|---------------------|--------------------|------------------------|-------------------------|----------------------|------------------|-----------------|
| 1         | Control | Male | 29                  | 38.86              | 0                      | 0.00                    | -0.14                | 3.60             | Caesarean birth |
| 2         | Control | Male | 27                  | 40.29              | 19                     | 2.71                    | 4.00                 | 3.17             | Caesarean birth |
| 3         | Control | Male | 27                  | 39.57              | 44                     | 6.29                    | 6.86                 | 3.55             | Caesarean birth |
| 4         | Control | Male | 31                  | 39.00              | 10                     | 1.43                    | 1.43                 | 3.55             | Caesarean birth |
| 5         | Control | Male | 29                  | 38.86              | 90                     | 12.86                   | 12.71                | 3.00             | Caesarean birth |
| 6         | Control | Male | 30                  | 38.00              | 111                    | 15.86                   | 14.86                | 3.20             | Caesarean birth |
| 7         | Control | Male | 29                  | 39.43              | 147                    | 21.00                   | 21.43                | 3.60             | Caesarean birth |

|    |         |      |    |       |     |       |       |      |                 |
|----|---------|------|----|-------|-----|-------|-------|------|-----------------|
| 8  | Control | Male | 37 | 39.29 | 122 | 17.43 | 17.71 | 3.10 | Caesarean birth |
| 9  | Control | Male | 31 | 39.00 | 154 | 22.00 | 22.00 | 3.15 | Caesarean birth |
| 10 | Control | Male | 28 | 39.00 | 171 | 24.43 | 24.43 | 3.00 | Caesarean birth |
| 11 | Control | Male | 31 | 37.43 | 171 | 24.43 | 22.86 | 3.10 | Caesarean birth |
| 12 | Control | Male | 29 | 39.00 | 186 | 26.57 | 26.57 | 2.40 | Caesarean birth |
| 13 | Control | Male | 34 | 38.57 | 216 | 30.86 | 30.43 | 3.55 | Caesarean birth |
| 14 | Control | Male | 28 | 39.29 | 239 | 34.14 | 34.43 | 2.77 | Caesarean birth |
| 15 | Control | Male | 33 | 37.00 | 296 | 42.29 | 40.29 | 3.25 | Caesarean birth |
| 16 | Control | Male | 33 | 37.71 | 365 | 52.14 | 50.86 | 2.80 | Caesarean birth |
| 17 | Control | Male | 31 | 40.00 | 338 | 48.29 | 49.29 | 2.80 | Caesarean birth |
| 18 | Control | Male | 34 | 39.29 | 344 | 49.14 | 49.43 | 2.95 | Caesarean birth |
| 1  | DEX     | Male | 38 | 37.86 | 181 | 25.86 | 24.71 | 3.30 | Caesarean birth |
| 2  | DEX     | Male | 34 | 38.00 | 185 | 26.43 | 25.43 | 3.20 | Caesarean birth |
| 3  | DEX     | Male | 28 | 38.57 | 197 | 28.14 | 27.71 | 3.10 | Caesarean birth |
| 4  | DEX     | Male | 31 | 37.00 | 203 | 29.00 | 27.00 | 3.10 | Caesarean birth |
| 5  | DEX     | Male | 19 | 35.00 | 82  | 11.71 | 7.71  | 2.40 | Caesarean birth |
| 6  | DEX     | Male | 31 | 34.14 | 61  | 8.71  | 3.86  | 3.30 | Caesarean birth |
| 7  | DEX     | Male | 30 | 35.86 | 111 | 15.86 | 12.71 | 2.50 | Caesarean birth |
| 8  | DEX     | Male | 31 | 35.57 | 93  | 13.29 | 9.86  | 2.18 | Caesarean birth |
| 9  | DEX     | Male | 31 | 35.57 | 106 | 15.14 | 11.71 | 2.24 | Caesarean birth |
| 10 | DEX     | Male | 26 | 34.14 | 123 | 17.57 | 12.71 | 2.76 | Caesarean birth |
| 11 | DEX     | Male | 31 | 31.00 | 181 | 25.86 | 17.86 | 2.35 | Caesarean birth |
| 12 | DEX     | Male | 24 | 36.00 | 184 | 26.29 | 23.29 | 2.75 | Caesarean birth |
| 13 | DEX     | Male | 32 | 36.00 | 184 | 26.29 | 23.29 | 2.1  | Caesarean birth |
| 14 | DEX     | Male | 38 | 36.43 | 341 | 48.71 | 46.14 | 2.75 | Caesarean birth |

|    |     |      |    |       |     |       |       |      |                 |
|----|-----|------|----|-------|-----|-------|-------|------|-----------------|
| 15 | DEX | Male | 37 | 36.00 | 231 | 33.00 | 30.00 | 2.9  | Caesarean birth |
| 16 | DEX | Male | 33 | 36.43 | 283 | 40.43 | 37.86 | 2.49 | Caesarean birth |
| 17 | DEX | Male | 36 | 38.86 | 365 | 52.14 | 52.00 | 3.35 | Caesarean birth |
| 18 | DEX | Male | 37 | 40.00 | 309 | 44.14 | 45.14 | 3.5  | Caesarean birth |
| 19 | DEX | Male | 27 | 39.86 | 365 | 52.14 | 53.00 | 3.4  | Caesarean birth |
| 20 | DEX | Male | 30 | 38.43 | 253 | 36.14 | 35.57 | 3.0  | Caesarean birth |
| 21 | DEX | Male | 27 | 38.57 | 308 | 44.00 | 43.57 | 3.7  | Caesarean birth |

## 2. Supporting figures

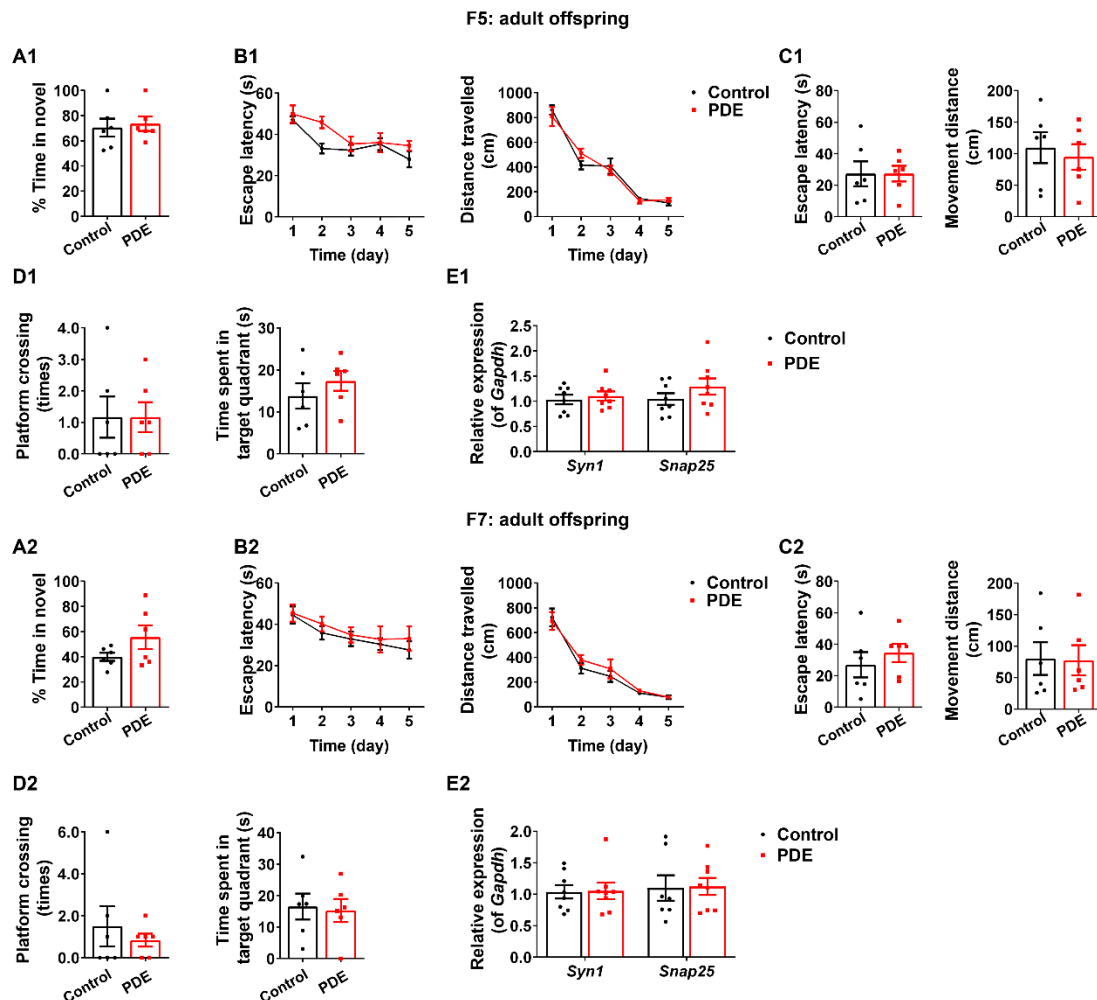

**Figure S1** Behavior and hippocampal synaptic protein expression in male adult offspring rats of F5 and F7 generations of prenatal dexamethasone exposure (PDE). (A1, A2) The discrimination ratio in novel object recognition (NOR) experiments ( $n =$

6). (B1, B2, C1, C2) The escape latencies and movement distances to find the hidden platform during five consecutive days of the training phase or the hidden platform trials in the Morris water maze (MWM) tests ( $n = 6$ ). (D1, D2) The number of swim crossings over the previous platform location and time spent in the previous platform location during the probe trials in the MWM tests ( $n = 6$ ). (E1, E2) mRNA expression of hippocampal synapsin I (*Syn1*) and synaptosome-associated protein 25 (*Snap25*) ( $n = 7-8$ ). Mean  $\pm$  SEM, using unpaired  $t$  test.

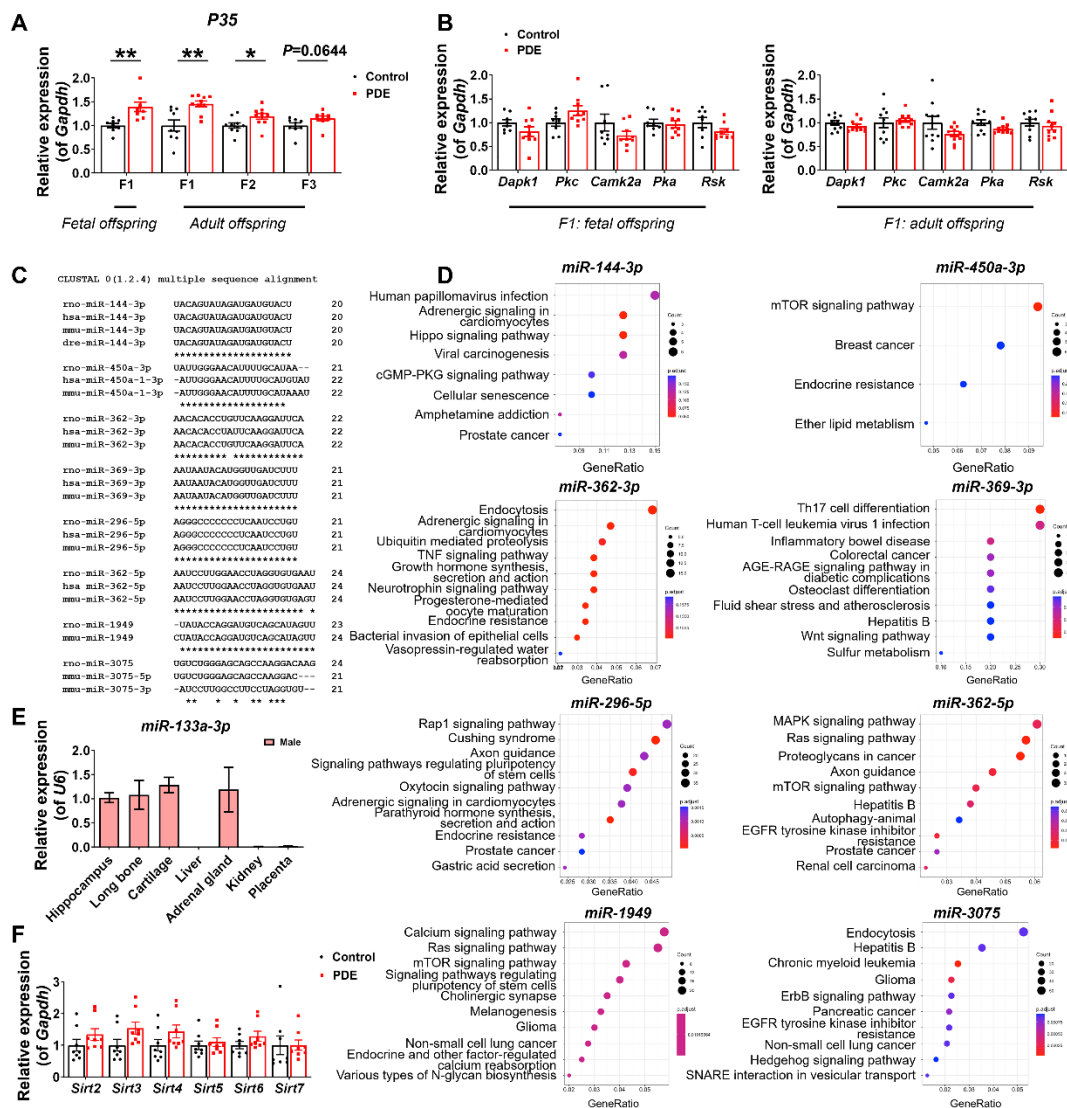

**Figure S2** Conservation analysis and pathway enrichment of miRNAs, *miR-133a-3p* expression in various organs under physiological conditions and the expression of hippocampal *P35*, phosphorylated kinase and silent information regulator in fetal rats. (A) mRNA expression of *P35* in the hippocampus of male fetal and adult offspring

rats of F1, F2, and F3 generations ( $n = 8-10$ ). (B) mRNA expression of death associated protein kinase 1 (*Dapk1*), protein kinase C (*Pkc*), calcium/calmodulin dependent protein kinase II alpha (*Camk2a*), protein kinase A (*Pka*), and ribosomal protein S6 kinase (*Rsk*) in the hippocampus of male fetal and adult offspring rats of F1 generation ( $n = 8-10$ ). (C) Sequence conservation of *miR-144-3p*, *miR-450a-3p*, *miR-362-3p*, *miR-369-3p*, *miR-296-5p*, *miR-362-5p*, *miR-1949* and *miR-3075* in rat, human, mouse, and zebrafish. (D) Signaling pathway enrichment map of *miR-144-3p*, *miR-450a-3p*, *miR-362-3p*, *miR-369-3p*, *miR-296-5p*, *miR-362-5p*, *miR-1949* and *miR-3075* target genes. (E) Relative expression of *miR-133a-3p* in the hippocampus, long bones, cartilage, liver, adrenal gland, kidney, and placenta of male fetal rats under physiological conditions ( $n = 4-6$ ). (F) mRNA expression of hippocampal silent information regulator 2 (*Sirt2*), *Sirt3*, *Sirt4*, *Sirt5*, *Sirt6*, and *Sirt7* in male fetal rats ( $n = 8$ ). Mean  $\pm$  SEM; \* $P < 0.05$ , \*\* $P < 0.01$  vs. control. Using unpaired *t* test.

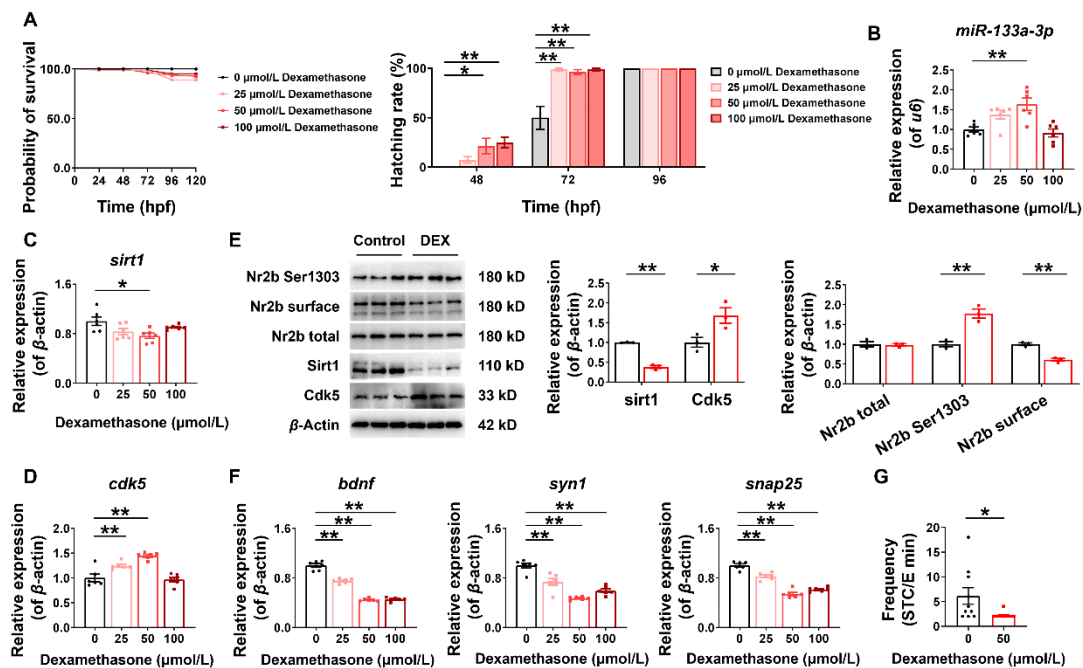

**Figure S3** Effects of different concentrations of dexamethasone exposure on neural development in zebrafish embryos. The zebrafish embryos were treated with 0, 25, 50, and 100  $\mu\text{M}$  dexamethasone (DEX) at 10 – 72 h post fertilization (hpf). (A) Probability of survival and hatching rate of zebrafish embryos at 24, 48, 72, 96, and

120 hpf ( $n = 12$ ). (B–D, F) Expression of *miR-133a-3p* and mRNA expression of silent information regulator 1 (*sirt1*), cyclin-dependent Kinase 5 (*cdk5*), brain-derived neurotrophic factor (*bdnf*), synapsin I (*syn1*) and synaptosome-associated protein 25 (*snap25*) in zebrafish at 120 hpf ( $n = 6$ ). (E) Protein levels of Sirt1, Cdk5 and N-methyl-D-aspartate receptor (Nr2b) in zebrafish at 120 hpf ( $n = 3$ ). (G) Spontaneous movement of zebrafish embryos at 24 hpf ( $n = 10$ ). Mean  $\pm$  S.E.M., \* $P < 0.05$ , \*\* $P < 0.01$  vs. control. using unpaired  $t$  test compared means between the control and treated group. Multiple groups comparison was analyzed by one-way ANOVA test, followed by Dunnett- $t$ -test.

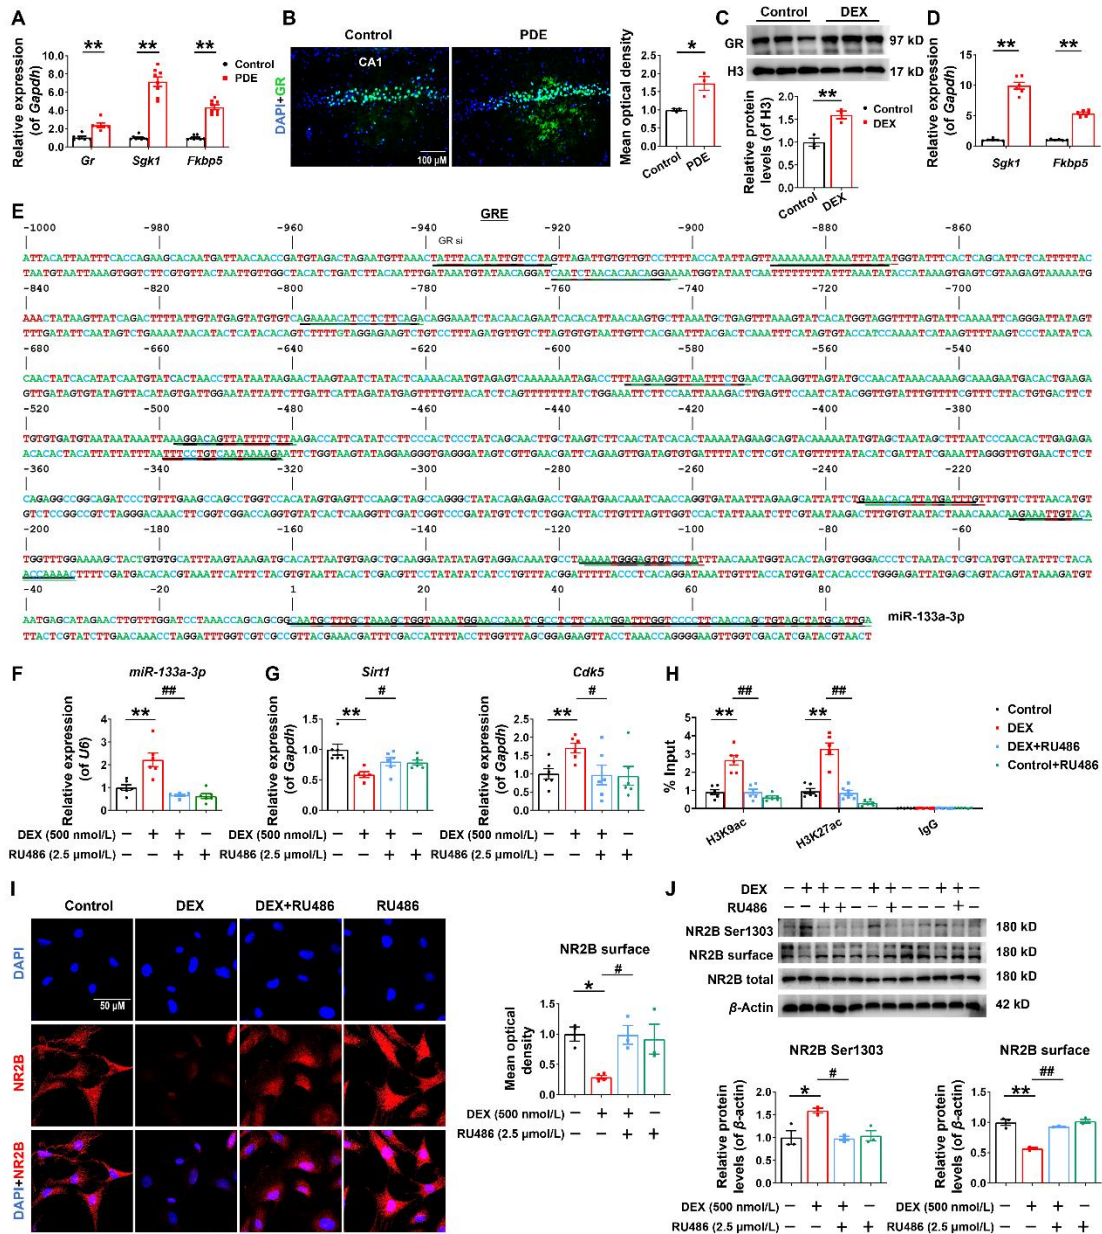

**Figure S4** GR activation might mediate the changes of *miR-133a-3p*/SIRT1/CDK5/NR2B signaling axis in prenatal dexamethasone exposure (PDE) offspring. (A, D) mRNA expression of hippocampal glucocorticoid receptor (*Gr*), serum- and glucocorticoid-inducible kinase 1 (*Sgk1*) and FKBP prolyl isomerase 5 (*Fkbp5*) in male fetal rats, as well as in H19-7 cell line ( $n = 6-8$ ). (B) Immunofluorescence co-labeling and quantification for GR (green) and 4',6-diamidino-2-phenylindole (DAPI) (blue) ( $n = 3$ ). Scale bar, 100  $\mu$ m. (C) Protein levels of GR in H19-7 cell line treated with 500 nmol/L DEX ( $n = 3$ ). (E) Glucocorticoid-response element (GRE) sites in the promoter region of *miR-133a-3p*



transcripts. (F–H) Relative expression of *miR-133a-3p*, mRNA expression of silent information regulator 1 (*Sirt1*) and cyclin-dependent kinase 5 (*Cdk5*), and the levels of acetyl-histone H3 at lys9 (H3K9ac) and H3K27ac in the promoter of *Cdk5* in the H19-7 cell line treated with 500 nmol/L DEX and (or) 2.5  $\mu$ mol/L RU486 ( $n = 6$ ). (I) Immunofluorescence co-labeling and quantification for *N*-methyl-D-aspartate receptor (NR2B) (red) and DAPI (blue) ( $n = 3–4$ ). Scale bar, 50  $\mu$ m. (J) Protein levels of NR2B in the H19-7 cell line treated with 500 nmol/L DEX and (or) 2.5  $\mu$ mol/L RU486 ( $n = 3$ ). Mean  $\pm$  SEM; \* $P < 0.05$ , \*\* $P < 0.01$  vs. Control, # $P < 0.05$ , ## $P < 0.01$  vs. DEX. Using unpaired  $t$  test compared means between the control and treated groups. Multiple groups comparison was analyzed by one-way ANOVA test, followed by Dunnett- $t$ -test.
